# Supplementary material
Source: Springer Nature journal article supplement (https://www.springermedizin.de/resource/supplementary/13012_2012_563_MOESM6_ESM.pdf/9630030)
Supplement: MOESM6 [file 9630030]



**Pre-Launch Set-up**

**IDENTIFY** and **PRE - POPULATE**  
workspace with  
select D&I Measures  
Jan - March, 2012

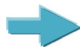

**LAUNCH** and  
**ANNOUNCE** initiative  
at Annual NIH D&I  
Conference  
March 19 - 20, 2012

**Phase 1:**

**RECRUIT** and **EDUCATE**

champions and users  
Methods: conference, training  
webinars (4), and email  
announcements

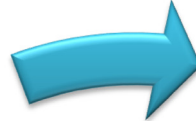

**Phase 2:**

**POPULATE GEM** with D&I  
measures and edit existing  
measures

Methods: Email notices and  
targeted outreach



**Ongoing web  
analytics and  
evaluation of  
workspace**

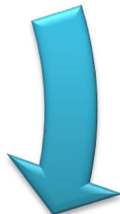

**Phase 3\*:**

**RATE** and **COMMENT**  
measures to build consensus  
Methods: Email notices and  
targeted outreach

**Phase 4\*:**

**CELEBRATE** and **SHARE**

preliminary results  
Methods: Email  
Announcements, Conferences,  
web, etc.

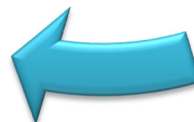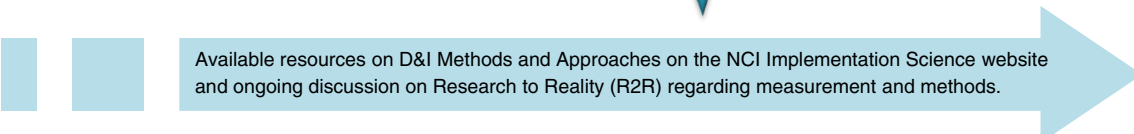

Available resources on D&I Methods and Approaches on the NCI Implementation Science website and ongoing discussion on Research to Reality (R2R) regarding measurement and methods.
